# Supplementary material for: Analyzing the Associations between Facets of Physical Literacy, Physical Fitness, and Physical Activity Levels: Gender- and Age-Specific Cross-Sectional Study in Preadolescent Children
Source: MDPI journal article supplement (doi:10.3390/educsci14040391), 2024-04-09
Supplement: s1 [file s1]

Supplementary table 1. Descriptive statistics and results of the Kolmogorov Smirnov test (KS) for total sample of participants

|                                      | Mean  | Minimum | Maximum | Std.Dev. | KS (p)        |
|--------------------------------------|-------|---------|---------|----------|---------------|
| Body height (cm)                     | 145.0 | 130.0   | 163.0   | 6.4      | 0.11 (> 0.20) |
| Body mass (kg)                       | 37.9  | 23.1    | 62.3    | 8.1      | 0.12 (> 0.10) |
| Body mass index (kg/m <sup>2</sup> ) | 17.9  | 13.3    | 27.9    | 3.0      | 0.10 (> 0.20) |
| Fat mass (%)                         | 24.3  | 14.5    | 40.3    | 5.4      | 0.09 (> 0.20) |
| Muscle mass (%)                      | 43.0  | 33.8    | 51.9    | 3.2      | 0.08 (> 0.20) |
| Trunk lift (reps)                    | 18.5  | 9.0     | 30.0    | 4.6      | 0.10 (> 0.20) |
| Broad jump (cm)                      | 137.2 | 102.0   | 191.0   | 19.9     | 0.09 (> 0.20) |
| Sit and reach (cm)                   | 48.1  | 0.0     | 75.0    | 12.4     | 0.13 (< 0.10) |
| Pacer (ml/kg/min)                    | 53.7  | 42.1    | 65.1    | 5.6      | 0.09 (> 0.20) |
| Sit-ups (reps)                       | 12.0  | 0.0     | 58.0    | 10.0     | 0.13 (> 0.10) |
| Push-ups (reps)                      | 8.2   | 0.0     | 38.0    | 7.5      | 0.12 (> 0.10) |
| PLAYself (score)                     | 73.2  | 28.7    | 94.1    | 11.2     | 0.07 (> 0.20) |
| PAQ-C (score)                        | 3.5   | 2.0     | 4.7     | 0.6      | 0.08 (> 0.20) |

Supplementary table 2. Correlations between study variables for total sample of participants (\* denotes p < 0.05); results are presented as Pearson’s correlation (95%CI)

|      | BH                       | BM                        | BMI                      | FM                       | MM                     | TL                    | BJ                    | SR                    | PT                    | SU                    | PU                    | PLAC                 |
|------|--------------------------|---------------------------|--------------------------|--------------------------|------------------------|-----------------------|-----------------------|-----------------------|-----------------------|-----------------------|-----------------------|----------------------|
| BH   | -                        |                           |                          |                          |                        |                       |                       |                       |                       |                       |                       |                      |
| BM   | 0.68*<br>(0.56, 0.77)    | -                         |                          |                          |                        |                       |                       |                       |                       |                       |                       |                      |
| BMI  | 0.33*<br>(0.15, 0.49)    | 0.91*<br>(0.87, 0.94)     | -                        |                          |                        |                       |                       |                       |                       |                       |                       |                      |
| FM   | 0.21<br>(0.02, 0.38)     | 0.75*<br>(0.65, 0.82)     | 0.84*<br>(0.77, 0.89)    | -                        |                        |                       |                       |                       |                       |                       |                       |                      |
| MM   | -0.28*<br>(-0.45, -0.1)  | -0.72*<br>(-0.8, -0.61)   | -0.77*<br>(-0.84, -0.68) | -0.94*<br>(-0.96, -0.91) | -                      |                       |                       |                       |                       |                       |                       |                      |
| TL   | 0.04<br>(-0.15, 0.23)    | 0.18<br>(-0.01, 0.36)     | 0.23*<br>(0.04, 0.4)     | 0.16<br>(-0.03, 0.3)     | -0.07<br>(-0.26, 0.12) | -                     |                       |                       |                       |                       |                       |                      |
| BJ   | 0.04<br>(-0.15, 0.23)    | 0.08<br>(-0.11, 0.27)     | 0.07<br>(-0.12, 0.26)    | 0.11<br>(-0.08, 0.29)    | -0.12<br>(-0.3, 0.07)  | 0.13<br>(-0.06, 0.31) | -                     |                       |                       |                       |                       |                      |
| SR   | -0.07<br>(-0.26, 0.12)   | 0.02<br>(-0.17, 0.21)     | 0.06<br>(-0.13, 0.25)    | 0.00<br>(-0.19, 0.19)    | 0.05<br>(-0.14, 0.24)  | 0.38*<br>(0.2, 0.53)  | 0.14<br>(-0.05, 0.32) | -                     |                       |                       |                       |                      |
| PT   | 0.09<br>(-0.1, 0.28)     | 0.02<br>(-0.17, 0.21)     | -0.05<br>(-0.24, 0.14)   | -0.06<br>(-0.25, 0.13)   | 0.01<br>(-0.18, 0.2)   | -0.12<br>(-0.3, 0.07) | 0.56*<br>(0.41, 0.68) | -0.09<br>(-0.28, 0.1) | -                     |                       |                       |                      |
| SU   | -0.16<br>(-0.34, 0.031)  | -0.14<br>(-0.32, 0.05)    | -0.10<br>(-0.28, 0.09)   | -0.12<br>(-0.3, 0.07)    | 0.10<br>(-0.09, 0.28)  | 0.20<br>(0.01, 0.38)  | 0.37*<br>(0.19, 0.52) | 0.13<br>(-0.06, 0.31) | 0.08<br>(-0.11, 0.27) | -                     |                       |                      |
| PU   | -0.07<br>(-0.26, 0.12)   | -0.02<br>(-0.21, 0.17)    | 0.01<br>(-0.18, 0.2)     | 0.03<br>(-0.16, 0.22)    | 0.00<br>(-0.19, 0.19)  | 0.03<br>(-0.16, 0.22) | 0.56*<br>(0.41, 0.68) | 0.12<br>(-0.07, 0.3)  | 0.36*<br>(0.18, 0.51) | 0.30*<br>(0.12, 0.46) | -                     |                      |
| PLAC | -0.26*<br>(-0.43, -0.07) | -0.24*<br>(-0.41, -0.053) | -0.17<br>(-0.35, 0.021)  | -0.05<br>(-0.24, 0.14)   | 0.07<br>(-0.12, 0.26)  | 0.10<br>(-0.09, 0.28) | 0.10<br>(-0.09, 0.28) | -0.09<br>(-0.28, 0.1) | 0.08<br>(-0.11, 0.27) | 0.14<br>(-0.05, 0.32) | 0.01<br>(-0.18, 0.2)  | -                    |
| PA   | 0.10<br>(-0.09, 0.28)    | 0.17<br>(-0.02, 0.35)     | 0.14<br>(-0.05, 0.32)    | 0.14<br>(-0.05, 0.32)    | -0.16<br>(-0.34, 0.03) | 0.14<br>(-0.05, 0.32) | 0.16<br>(-0.03, 0.34) | 0.12<br>(-0.07, 0.3)  | 0.07<br>(-0.12, 0.26) | 0.03<br>(-0.16, 0.22) | 0.07<br>(-0.12, 0.26) | 0.28*<br>(0.1, 0.45) |

Legend: BH – body height, BM – body mass, BMI – body mass index, FM – fat mass, MM – muscle mass, TL – trunk lift, BJ – broad jump, SR – sit and reach, PT – pacer test, SU – sit ups, PU – push-ups, PLAC – physical literacy (affective and cognitive domains) obtained by PLAYself questionnaire, PA – physical activity obtained by PAQ-C

Supplementary table 3. Age stratified correlations (3<sup>rd</sup> graders and 4<sup>th</sup> graders) between study variables (\* denotes p < 0.05); results are presented as Pearson’s correlation (95%CI)

|     |     | BH                      | BM                       | BMI                      | FM                       | MM                     | TL                    | BJ | SR | PT | SU | PU | PL <sub>AC</sub> |
|-----|-----|-------------------------|--------------------------|--------------------------|--------------------------|------------------------|-----------------------|----|----|----|----|----|------------------|
| BH  | 3rd | -                       |                          |                          |                          |                        |                       |    |    |    |    |    |                  |
|     | 4th | -                       |                          |                          |                          |                        |                       |    |    |    |    |    |                  |
| BM  | 3rd | 0.60*<br>(0.39, 0.75)   | -                        |                          |                          |                        |                       |    |    |    |    |    |                  |
|     | 4th | 0.75*<br>(0.61, 0.85)   | -                        |                          |                          |                        |                       |    |    |    |    |    |                  |
| BMI | 3rd | 0.25<br>(-0.03, 0.49)   | 0.92*<br>(0.86, 0.95)    | -                        |                          |                        |                       |    |    |    |    |    |                  |
|     | 4th | 0.43*<br>(0.19, 0.62)   | 0.92*<br>(0.87, 0.95)    | -                        |                          |                        |                       |    |    |    |    |    |                  |
| FM  | 3rd | 0.09<br>(-0.19, 0.35)   | 0.75*<br>(0.6, 0.85)     | 0.86*<br>(0.77, 0.92)    | -                        |                        |                       |    |    |    |    |    |                  |
|     | 4th | 0.28<br>(0.02, 0.51)    | 0.75*<br>(0.61, 0.85)    | 0.85<br>(0.75, 0.91)     | -                        |                        |                       |    |    |    |    |    |                  |
| MM  | 3rd | -0.25<br>(-0.49, 0.03)  | -0.70*<br>(-0.82, -0.53) | -0.72*<br>(-0.83, -0.56) | -0.88*<br>(-0.93, -0.8)  | -                      |                       |    |    |    |    |    |                  |
|     | 4th | -0.28<br>(-0.51, -0.02) | -0.74*<br>(-0.84, -0.59) | -0.85*<br>(-0.91, -0.75) | -0.99*<br>(-0.99, -0.98) | -                      |                       |    |    |    |    |    |                  |
| TL  | 3rd | -0.07<br>(-0.34, 0.21)  | 0.19<br>(-0.09, 0.44)    | 0.27<br>(-0.01, 0.51)    | 0.18<br>(-0.1, 0.43)     | 0.01<br>(-0.26, 0.28)  | -                     |    |    |    |    |    |                  |
|     | 4th | 0.10<br>(-0.17, 0.36)   | 0.17<br>(-0.1, 0.42)     | 0.19<br>(-0.08, 0.43)    | 0.14<br>(-0.13, 0.39)    | -0.14<br>(-0.39, 0.13) | -                     |    |    |    |    |    |                  |
| BJ  | 3rd | -0.12<br>(-0.38, 0.16)  | -0.21<br>(-0.46, 0.07)   | -0.22<br>(-0.46, 0.06)   | -0.16<br>(-0.41, 0.12)   | 0.13<br>(-0.15, 0.39)  | 0.13<br>(-0.15, 0.39) | -  |    |    |    |    |                  |
|     | 4th | 0.09<br>(0.83, 0.94)    | 0.31*<br>(0.05, 0.53)    | 0.38*<br>(0.13, 0.59)    | 0.30*<br>(0.04, 0.52)    | 0.31*<br>(0.05, 0.53)  | 0.07<br>(-0.2, 0.33)  | -  |    |    |    |    |                  |

|                  |     |                          |                          |                          |                          |                         |                         |                       |                        |                       |                        |                        |                       |
|------------------|-----|--------------------------|--------------------------|--------------------------|--------------------------|-------------------------|-------------------------|-----------------------|------------------------|-----------------------|------------------------|------------------------|-----------------------|
| SR               | 3rd | -0.09<br>(-0.35, 0.19)   | 0.19<br>(-0.09, 0.44)    | 0.27<br>(-0.01, 0.51)    | 0.28<br>(0.01, 0.51)     | -0.15<br>(-0.41, 0.13)  | 0.33*<br>(0.06, 0.55)   | 0.21<br>(-0.07, 0.46) | -                      |                       |                        |                        |                       |
|                  | 4th | -0.11<br>(-0.36, 0.16)   | -0.20<br>(-0.44, 0.07)   | -0.20<br>(-0.44, 0.07)   | -0.32*<br>(-0.54, -0.06) | 0.32*<br>(-0.54, -0.06) | 0.41*<br>(-0.61, -0.16) | 0.00<br>(-0.27, 0.27) | -                      |                       |                        |                        |                       |
| PT               | 3rd | -0.03<br>(-0.3, 0.24)    | -0.28<br>(-0.51, -0.01)  | -0.34*<br>(-0.56, -0.07) | -0.35*<br>(-0.57, -0.09) | 0.24<br>(-0.04, 0.48)   | -0.20<br>(-0.45, 0.08)  | 0.54*<br>(0.31, 0.71) | -0.23<br>(-0.47, 0.05) | -                     |                        |                        |                       |
|                  | 4th | 0.19<br>(-0.08, 0.43)    | 0.36*<br>(0.1, 0.57)     | 0.36*<br>(0.1, 0.57)     | 0.24<br>(-0.03, 0.48)    | -0.24<br>(-0.48, 0.03)  | -0.03<br>(-0.29, 0.24)  | 0.59*<br>(0.38, 0.74) | 0.08<br>(-0.19, 0.34)  | -                     |                        |                        |                       |
| SU               | 3rd | -0.17<br>(-0.42, 0.11)   | -0.10<br>(-0.36, 0.18)   | -0.05<br>(-0.32, 0.23)   | -0.06<br>(-0.33, 0.22)   | 0.02<br>(-0.25, 0.29)   | 0.24<br>(-0.04, 0.48)   | 0.53*<br>(0.3, 0.7)   | 0.06<br>(-0.22, 0.33)  | 0.12<br>(-0.16, 0.38) | -                      |                        |                       |
|                  | 4th | -0.15<br>(-0.4, 0.12)    | -0.20<br>(-0.44, 0.07)   | -0.19<br>(-0.43, 0.08)   | -0.20<br>(-0.44, 0.07)   | 0.20<br>(-0.07, 0.44)   | 0.17<br>(-0.1, 0.42)    | 0.26<br>(-0.01, 0.49) | 0.30<br>(0.04, 0.52)   | 0.02<br>(-0.25, 0.28) | -                      |                        |                       |
| PU               | 3rd | -0.08<br>(-0.35, 0.2)    | -0.18<br>(-0.43, 0.1)    | -0.18<br>(-0.43, 0.1)    | -0.22<br>(-0.46, 0.06)   | 0.28<br>(0.01, 0.51)    | 0.08<br>(-0.2, 0.35)    | 0.50*<br>(0.26, 0.68) | 0.21<br>(-0.07, 0.46)  | 0.31*<br>(0.04, 0.54) | 0.36*<br>(0.1, 0.58)   | -                      |                       |
|                  | 4th | -0.07<br>(-0.33, 0.2)    | 0.09<br>(-0.18, 0.35)    | 0.18<br>(-0.09, 0.43)    | 0.19<br>(-0.08, 0.43)    | -0.19<br>(-0.43, 0.08)  | -0.02<br>(-0.28, 0.25)  | 0.62*<br>(0.42, 0.76) | 0.04<br>(-0.23, 0.3)   | 0.43*<br>(0.19, 0.62) | 0.29<br>(0.03, 0.52)   | -                      |                       |
| PL <sub>AC</sub> | 3rd | -0.59*<br>(-0.74, -0.38) | -0.51*<br>(-0.69, -0.28) | -0.33*<br>(-0.55, -0.06) | -0.20<br>(-0.45, 0.08)   | 0.22<br>(-0.06, 0.46)   | 0.16<br>(-0.12, 0.41)   | 0.06<br>(-0.22, 0.33) | -0.13<br>(-0.39, 0.15) | 0.03<br>(-0.24, 0.3)  | 0.15<br>(-0.13, 0.41)  | -0.19<br>(-0.44, 0.09) | -                     |
|                  | 4th | 0.04<br>(-0.23, 0.3)     | 0.07<br>(-0.2, 0.33)     | 0.07<br>(-0.2, 0.33)     | 0.10<br>(-0.17, 0.36)    | -0.10<br>(-0.36, 0.17)  | -0.03<br>(-0.29, 0.24)  | 0.12<br>(-0.15, 0.37) | -0.06<br>(-0.32, 0.21) | 0.15<br>(-0.12, 0.4)  | 0.12<br>(-0.15, 0.37)  | 0.18<br>(-0.09, 0.43)  | -                     |
| PA               | 3rd | -0.06<br>(-0.33, 0.22)   | 0.05<br>(-0.23, 0.32)    | 0.07<br>-0.21, 0.34      | 0.17<br>(-0.11, 0.42)    | -0.19<br>(-0.44, 0.09)  | 0.09<br>(-0.19, 0.35)   | 0.00<br>(-0.27, 0.27) | 0.12<br>(-0.16, 0.38)  | 0.00<br>(-0.27, 0.27) | -0.04<br>(-0.31, 0.24) | -0.02<br>(-0.29, 0.25) | 0.18<br>(-0.01, 0.43) |
|                  | 4th | 0.21<br>(-0.06, 0.45)    | 0.29<br>(0.03, 0.52)     | 0.26<br>(-0.01, 0.49)    | 0.08<br>(-0.19, 0.34)    | -0.09<br>(-0.35, 0.18)  | 0.14<br>(-0.13, 0.39)   | 0.26<br>(-0.01, 0.49) | 0.05<br>(-0.22, 0.31)  | 0.17<br>(-0.1, 0.42)  | 0.19<br>(-0.08, 0.43)  | 0.14<br>(-0.13, 0.39)  | 0.41*<br>(0.16, 0.61) |

Legend: BH – body height, BM – body mass, BMI – body mass index, FM – fat mass, MM – muscle mass, TL – trunk lift, BJ – broad jump, SR – sit and reach, PT – pacer test, SU – sit ups, PU – push-ups, PL<sub>AC</sub> – physical literacy (affective and cognitive domains) obtained by PLAYself questionnaire, PA – physical activity obtained by PAQ-C

Supplementary table 4. Gender stratified (B – boys, G – girls) correlations between study variables for total sample of participants (\* denotes p < 0.05); results are presented as Pearson’s correlation (95%CI)

|     |   | BH                       | BM                       | BMI                      | FM                       | MM                     | TL                    | BJ | SR | PT | SU | PU | PL <sub>AC</sub> |
|-----|---|--------------------------|--------------------------|--------------------------|--------------------------|------------------------|-----------------------|----|----|----|----|----|------------------|
| BH  | B | -                        |                          |                          |                          |                        |                       |    |    |    |    |    |                  |
|     | G | -                        |                          |                          |                          |                        |                       |    |    |    |    |    |                  |
| BM  | B | 0.74*<br>(0.59, 0.84)    | -                        |                          |                          |                        |                       |    |    |    |    |    |                  |
|     | G | 0.62*<br>(0.42, 0.76)    | -                        |                          |                          |                        |                       |    |    |    |    |    |                  |
| BMI | B | 0.49*<br>0.26, 0.67      | 0.94*<br>(0.9, 0.96)     | -                        |                          |                        |                       |    |    |    |    |    |                  |
|     | G | 0.18<br>(-0.1, 0.43)     | 0.88*<br>(0.8, 0.93)     | -                        |                          |                        |                       |    |    |    |    |    |                  |
| FM  | B | 0.30*<br>(0.04, 0.53)    | 0.79*<br>(0.66, 0.87)    | 0.87*<br>(0.79, 0.92)    | -                        |                        |                       |    |    |    |    |    |                  |
|     | G | 0.12<br>(-0.16, 0.38)    | 0.70*<br>(0.53, 0.82)    | 0.81*<br>(0.69, 0.89)    | -                        |                        |                       |    |    |    |    |    |                  |
| MM  | B | -0.30*<br>(-0.53, -0.04) | -0.79*<br>(-0.87, -0.66) | -0.87*<br>(-0.92, -0.79) | -0.99*<br>(-0.99, -0.98) | -                      |                       |    |    |    |    |    |                  |
|     | G | -0.25<br>(-0.49, 0.02)   | -0.66*<br>(-0.79, -0.47) | -0.67*<br>(-0.8, -0.49)  | -0.89*<br>(-0.94, -0.82) | -                      |                       |    |    |    |    |    |                  |
| TL  | B | 0.07<br>(-0.2, 0.33)     | 0.06<br>(-0.21, 0.32)    | 0.07<br>(-0.2, 0.33)     | 0.08<br>(-0.19, 0.34)    | -0.08<br>(-0.34, 0.19) | -                     |    |    |    |    |    |                  |
|     | G | 0.06<br>(-0.21, 0.33)    | 0.36*<br>(0.1, 0.57)     | 0.41*<br>(0.16, 0.61)    | 0.26<br>(-0.01, 0.5)     | -0.09<br>(-0.35, 0.18) | -                     |    |    |    |    |    |                  |
| BJ  | B | 0.17<br>(-0.1, 0.42)     | 0.11<br>(-0.16, 0.37)    | 0.04<br>(-0.23, 0.3)     | 0.20<br>(-0.07, 0.44)    | -0.19<br>(-0.44, 0.08) | 0.08<br>(-0.19, 0.34) | -  |    |    |    |    |                  |

|                  |   |                          |                         |                        |                          |                        |                        |                       |                        |                        |                        |                        |                       |
|------------------|---|--------------------------|-------------------------|------------------------|--------------------------|------------------------|------------------------|-----------------------|------------------------|------------------------|------------------------|------------------------|-----------------------|
|                  | G | -0.10<br>(-0.36, 0.18)   | 0.04<br>(-0.23, 0.31)   | 0.11<br>(-0.17, 0.37)  | 0.02<br>(-0.25, 0.29)    | -0.05<br>(-0.32, 0.22) | 0.30*<br>(0.03, 0.53)  | -                     |                        |                        |                        |                        |                       |
| SR               | B | 0.19<br>(-0.08, 0.44)    | 0.08<br>(-0.19, 0.34)   | 0.01<br>(-0.26, 0.28)  | -0.13<br>(-0.38, 0.14)   | 0.13<br>(-0.14, 0.38)  | 0.42*<br>(0.17, 0.62)  | 0.31*<br>(0.05, 0.53) | -                      |                        |                        |                        |                       |
|                  | G | -0.19<br>(-0.44, 0.085)  | 0.01<br>(-0.26, 0.28)   | 0.11<br>(-0.17, 0.37)  | 0.08<br>(-0.19, 0.34)    | 0.00<br>(-0.27, 0.27)  | 0.15<br>(-0.13, 0.4)   | 0.16<br>(-0.12, 0.41) | -                      |                        |                        |                        |                       |
| PT               | B | 0.06<br>(-0.21, 0.32)    | 0.08<br>(-0.19, 0.34)   | 0.04<br>(-0.23, 0.3)   | 0.11<br>(-0.16, 0.37)    | -0.11<br>(-0.37, 0.16) | -0.08<br>(-0.34, 0.19) | 0.54*<br>(0.32, 0.71) | 0.17<br>(-0.1, 0.42)   | -                      |                        |                        |                       |
|                  | G | 0.09<br>(-0.18, 0.35)    | -0.10<br>(-0.36, 0.18)  | -0.19<br>(-0.44, 0.09) | -0.31*<br>(-0.54, -0.04) | 0.19<br>(-0.09, 0.44)  | 0.12<br>(-0.16, 0.38)  | 0.57*<br>(0.35, 0.73) | -0.02<br>(-0.29, 0.25) | -                      |                        |                        |                       |
| SU               | B | -0.12<br>(-0.38, 0.15)   | -0.14<br>(-0.39, 0.13)  | -0.12<br>(-0.38, 0.15) | -0.13<br>(-0.38, 0.14)   | 0.13<br>(-0.14, 0.38)  | -0.02<br>(-0.29, 0.25) | 0.36*<br>(0.1, 0.57)  | 0.17<br>(-0.1, 0.42)   | -0.01<br>(-0.28, 0.26) | -                      |                        |                       |
|                  | G | -0.18<br>(-0.43, 0.1)    | -0.15<br>(-0.4, 0.13)   | -0.09<br>(-0.35, 0.18) | -0.13<br>(-0.39, 0.15)   | 0.08<br>(-0.19, 0.34)  | 0.30*<br>(0.03, 0.53)  | 0.42*<br>(0.17, 0.62) | 0.08<br>(-0.19, 0.34)  | 0.23<br>(-0.04, 0.47)  | -                      |                        |                       |
| PU               | B | 0.18<br>(-0.09, 0.43)    | 0.09<br>(-0.18, 0.35)   | 0.03<br>(-0.24, 0.3)   | 0.07<br>(-0.2, 0.33)     | -0.07<br>(-0.33, 0.2)  | 0.07<br>(-0.2, 0.33)   | 0.60*<br>(0.4, 0.75)  | 0.20<br>(-0.07, 0.44)  | 0.28<br>(0.01, 0.51)   | 0.13<br>(-0.14, 0.38)  | -                      |                       |
|                  | G | -0.41*<br>(-0.61, -0.16) | -0.20<br>(-0.45, 0.07)  | -0.01<br>(-0.28, 0.26) | -0.02<br>(-0.29, 0.25)   | 0.12<br>(-0.16, 0.38)  | 0.26<br>(-0.01, 0.5)   | 0.49*<br>(0.25, 0.67) | 0.37*<br>(0.11, 0.58)  | 0.32*<br>(0.05, 0.54)  | 0.57*<br>(0.35, 0.73)  | -                      |                       |
| PL <sub>AC</sub> | B | -0.40*<br>(-0.6, -0.15)  | -0.28<br>(-0.51, -0.01) | -0.15<br>(-0.4, 0.12)  | 0.01<br>(-0.26, 0.28)    | -0.01<br>(-0.28, 0.26) | 0.26<br>(-0.01, 0.49)  | 0.17<br>(-0.1, 0.42)  | -0.10<br>(-0.36, 0.17) | 0.02<br>(-0.25, 0.29)  | 0.06<br>(-0.21, 0.32)  | -0.12<br>(-0.38, 0.15) | -                     |
|                  | G | -0.13<br>(-0.39, 0.15)   | -0.21<br>(-0.45, 0.06)  | -0.19<br>(-0.44, 0.09) | -0.12<br>(-0.38, 0.16)   | 0.15<br>(-0.13, 0.4)   | -0.04<br>(-0.31, 0.23) | 0.03<br>(-0.24, 0.3)  | -0.11<br>(-0.37, 0.17) | 0.19<br>(-0.09, 0.44)  | 0.19<br>(-0.09, 0.44)  | 0.19<br>(-0.09, 0.44)  | -                     |
| PA               | B | 0.19<br>(-0.09, 0.44)    | 0.27<br>(0.01, 0.5)     | 0.25<br>(-0.02, 0.49)  | 0.24<br>(-0.03, 0.48)    | -0.24<br>(-0.48, 0.03) | 0.29<br>(0.02, 0.52)   | 0.18<br>(-0.09, 0.43) | 0.21<br>(-0.06, 0.45)  | 0.04<br>(-0.23, 0.3)   | -0.02<br>(-0.29, 0.25) | 0.08<br>(-0.19, 0.34)  | 0.11<br>(-0.16, 0.37) |
|                  | G | 0.03<br>(-0.24, 0.3)     | 0.07<br>(-0.2, 0.33)    | 0.04<br>(-0.23, 0.31)  | 0.04<br>(-0.23, 0.31)    | -0.08<br>(-0.34, 0.19) | 0.05<br>(-0.22, 0.32)  | 0.15<br>(-0.13, 0.4)  | 0.10<br>(-0.18, 0.36)  | 0.12<br>(-0.16, 0.38)  | 0.06<br>(-0.21, 0.33)  | 0.07<br>(-0.2, 0.33)   | 0.44*<br>(0.19, 0.63) |

Legend: BH – body height, BM – body mass, BMI – body mass index, FM – fat mass, MM – muscle mass, TL – trunk lift, BJ – broad jump, SR – sit and reach, PT – pacer test, SU – sit ups, PU – push-ups, PL<sub>AC</sub> – physical literacy (affective and cognitive domains) obtained by PLAYself questionnaire, PA – physical activity obtained by PAQ-C
